# Supplementary material for: De Novo FGF12 (Fibroblast Growth Factor 12) Functional Variation Is Potentially Associated With Idiopathic Ventricular Tachycardia
Source: PubMed Central journal article supplement (PMC5586455; doi:10.1161/jaha.117.006130), 2017-08-03

# **SUPPLEMENTAL MATERIAL**

**Figure S1. LD structure and haplotype block in *FGF12B* in Chinese Han population.** Linkage disequilibrium ( $D'$ ) for SNPs spanning a 266.3kbps genomic region in *FGF12B* on chromosome 3, are generated by Haploview 4.0.

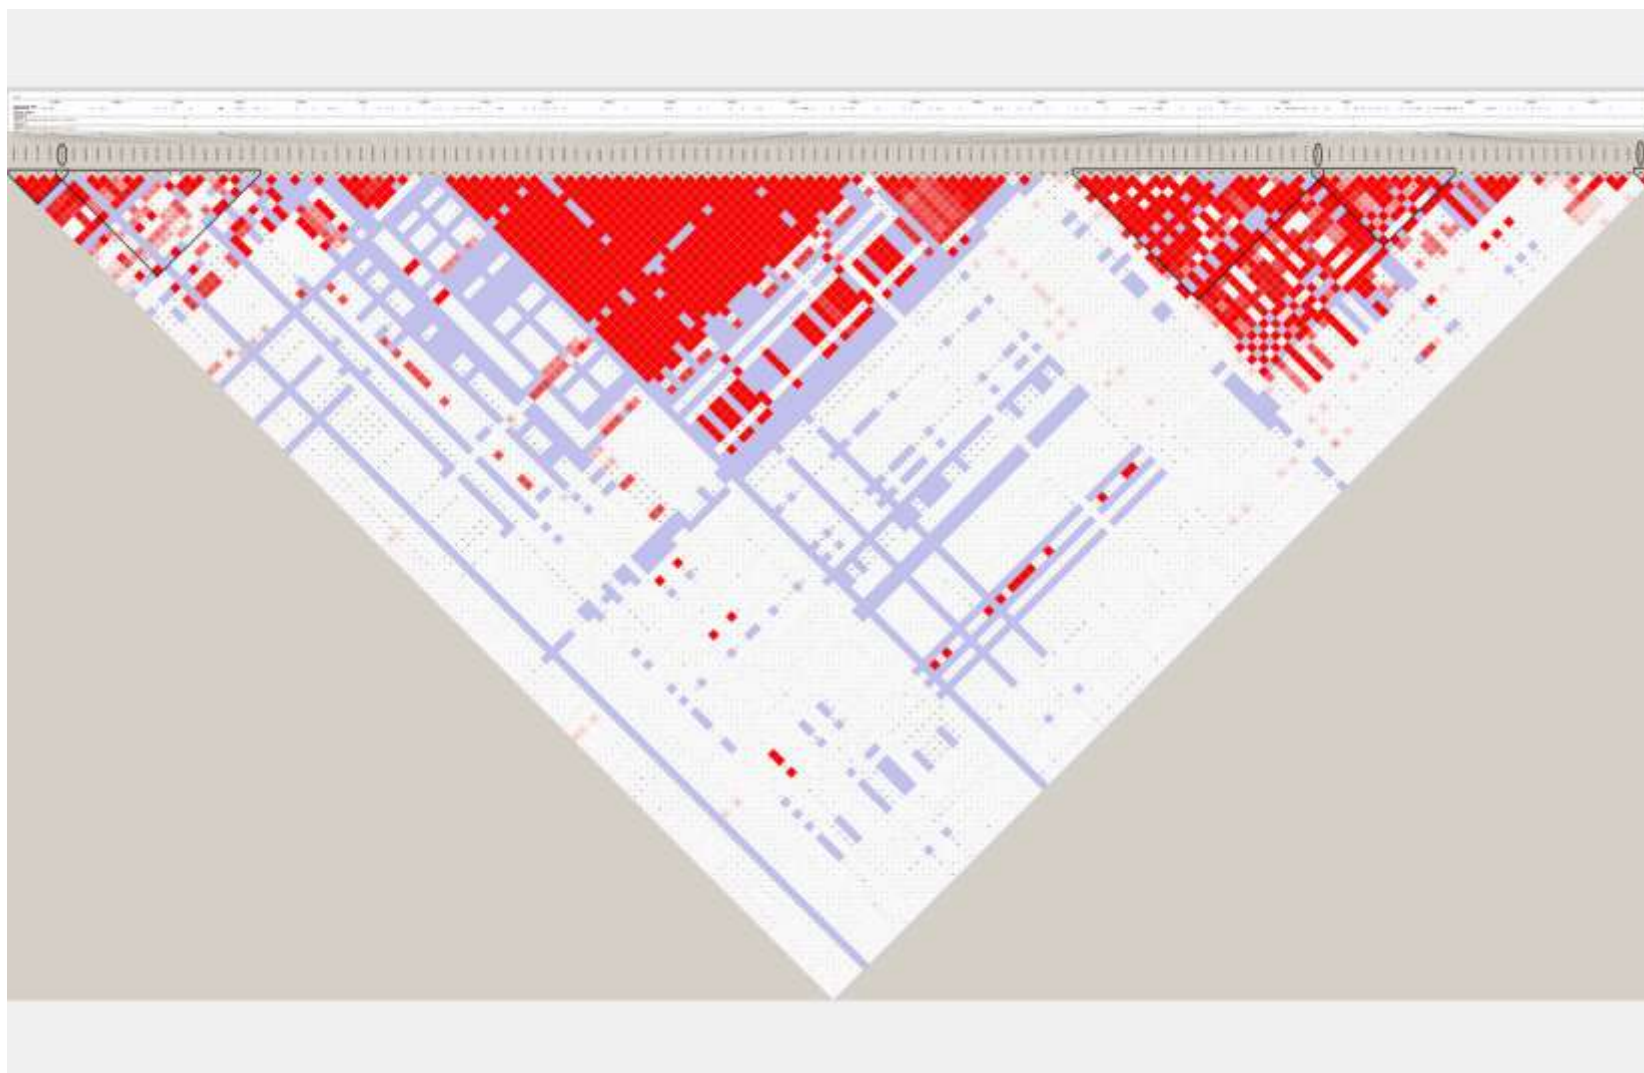

**Figure S2. A schematic giving the standard, stylized intron/exon gene map of FGF12. Three tag SNPs and area covered by the disequilibrium blocks they tag, the three new rare mutations, and the three common SNPs identified in patients by the re-sequencing were indicated on the schematic.**

**a**

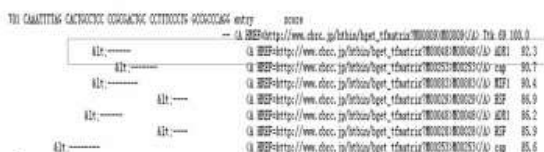

**b**

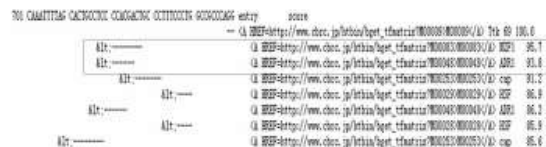

**c**

718 tccccgcgac tgcctt

| Model ID | Model name | Score | Relative score    | Start | End | Strand | predicted site sequence |
|----------|------------|-------|-------------------|-------|-----|--------|-------------------------|
| MA0956.1 | MZF1       | 6.510 | 0.573751908405984 | 1     | 6   | -1     | cggggA                  |
| MA0632.1 | TcfE       | 6.021 | 0.575448175861752 | 1     | 10  | -1     | gtcgcgggA               |
| MA0632.1 | TcfE       | 6.021 | 0.675448175861752 | 1     | 10  | 1      | Tccccgcgac              |
| MA0831.1 | TFE3       | 4.623 | 0.815167614162939 | 1     | 18  | 1      | Tccccgcgac              |
| MA0007.1 | Pax2       | 6.425 | 0.89629859110259  | 4     | 11  | -1     | agtcgag                 |
| MA0498.2 | MEIS1      | 0.901 | 0.800468963468584 | 6     | 12  | 1      | gtactg                  |

**d**

718 tccccacgac tgcctt

| Model ID | Model name | Score | Relative score    | Start | End | Strand | predicted site sequence |
|----------|------------|-------|-------------------|-------|-----|--------|-------------------------|
| MA0956.1 | MZF1       | 9.095 | 0.995687318791103 | 1     | 6   | -1     | tggggA                  |
| MA0130.1 | ZNF354C    | 6.723 | 0.904024650450988 | 2     | 7   | 1      | cggcAc                  |
| MA0259.1 | ARNT-HPIA  | 4.644 | 0.98447244204401  | 4     | 11  | -1     | agtcgag                 |
| MA0007.1 | Pax2       | 5.855 | 0.872915401603088 | 4     | 11  | -1     | agtcgag                 |
| MA0009.1 | MFG-TFEZL1 | 4.209 | 0.805692934199387 | 6     | 10  | 1      | cacgac                  |
| MA0498.2 | MEIS1      | 2.103 | 0.927618881003162 | 6     | 12  | 1      | agactg                  |

**Figure S3. Transcription Factor MZF1 and ZNF354C do not regulate the expression of the FGF12 at the mutant site c.G723A.** **a**, Effect of MZF1 on the pGL3-Basic-FGF12B-5'UTR-Mut luciferase reporters compared with pGL3-Basic-FGF12B-5'UTR-Wt transfected into HeLa cells. **b**, Effects of ZNF354c on the pGL3-Basic-FGF12B-5'UTR-Mut luciferase reporters compared with pGL3-Basic-FGF12B-5'UTR-Wt. Luciferase activities were calculated as the ratio of firefly/renilla activities and normalized to the negative control (empty-vectors) group. Results were obtained from three independent experiments. Data are shown as means $\pm$ SD.

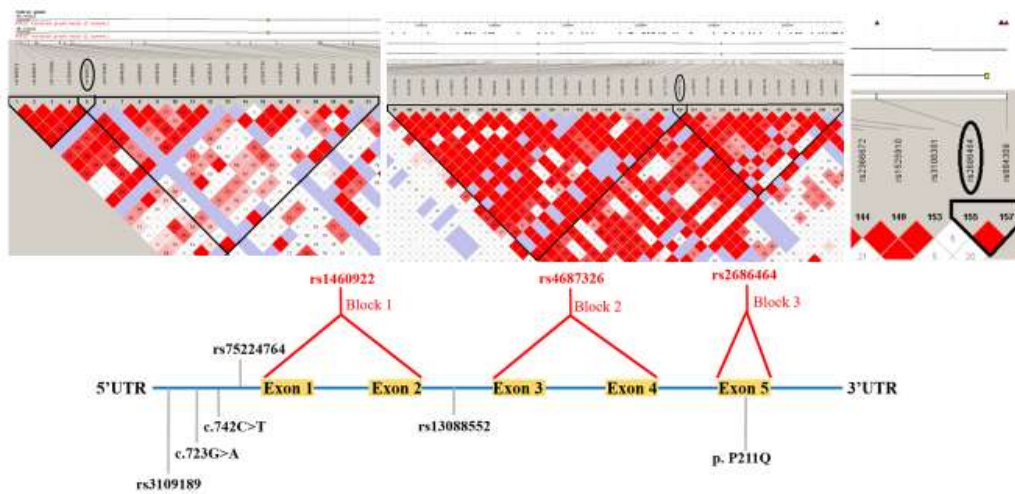

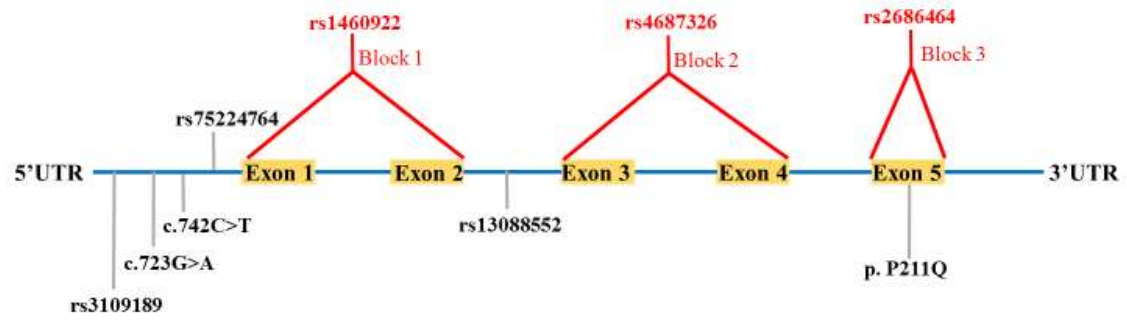

Supplement: JAH3-6-e006130-s001.pdf [file JAH3-6-e006130-s001.pdf]
